# Supplementary material
Source: PubMed Central journal article supplement (PMC8506143)
Supplement: mmc1.pdf [file mmc1.pdf]

**Supplemental information**

**Repeated vaccination against SARS-CoV-2  
elicits robust polyfunctional T cell response  
in allogeneic stem cell transplantation recipients**

**Patrick Harrington, Katie J. Doores, Chandan Saha, Jamie Saunders, Fiona Child, Richard Dillon, Sukran Saglam, Kavita Raj, Donal McLornan, Daniele Avenoso, Shahram Kordasti, Amy O'Reilly, Andreas Espehana, Thomas Lechmere, Hataf Khan, Michael H. Malim, Claire Harrison, Varun Mehra, and Hugues de Lavallade**

Table S1. Patient Characteristics and Antibody Response Pre-Vaccine and Post 1st and 2nd Vaccine Doses.

| Patient number | Age / Sex | Diagnosis | Time from SCT | GvHD     | ECP | Systemic IST   | Anti-N IgG OD | Anti-S IgG – Pre | Anti-S IgG – 1st | Neut. Ab – 1st | Anti-S IgG – 2 <sup>nd</sup> | Neut. Ab – 2 <sup>nd</sup> |
|----------------|-----------|-----------|---------------|----------|-----|----------------|---------------|------------------|------------------|----------------|------------------------------|----------------------------|
| 01             | 58 / M    | MDS       | 38            | Chronic  | Yes | CsA            | 1.5           | <25              | <25              | ND             | <25                          | ND                         |
| 02             | 65 / M    | MDS       | 19            | Chronic  | Yes | CsA            | 0.6           | <25              | <25              | ND             | <25                          | ND                         |
| 03             | 29/ F     | B-ALL     | 19            | Resolved | Yes | Nil            | 0.8           | <25              | <25              | ND             | 30                           | 222                        |
| 04             | 59 / M    | AML       | 68            | Chronic  | Yes | Nil            | 0.7           | -                | -                | -              | 2566                         | 782                        |
| 05             | 55 / F    | MPAL      | 59            | Chronic  | Yes | Pred, MMF, Rux | -             | <25              | <25              | ND             | -                            | -                          |
| 06             | 34 / F    | AML       | 92            | Chronic  | Yes | Nil            | 0.8           | -                | -                | -              | 811                          | 303                        |
| 07             | 58 / M    | AML       | 70            | Chronic  | Yes | Hydrocort.     | 1.0           | <25              | 424              | 968            | 856                          | 339                        |
| 08             | 71 / M    | MDS       | 32            | Chronic  | Yes | Nil            | -             | <25              | <25              | ND             | -                            | -                          |
| 09             | 68 / F    | AML       | 24            | Chronic  | Yes | Nil            | 1.4           | <25              | <25              | ND             | <25                          | ND                         |
| 10             | 51 / F    | T-ALL     | 74            | Chronic  | Yes | Nil            | 1.4           | 25               | 25               | 155            | -                            | -                          |
| 11             | 41 / M    | AML       | 59            | Chronic  | Yes | MMF            | 1.4           | <25              | 25               | 53             | 1012                         | 791                        |
| 12             | 58 / M    | AML       | 26            | Chronic  | Yes | MMF            | 0.8           | -                | <25              | ND             | 67                           | 162                        |
| 13             | 54 / M    | MDS       | 33            | Chronic  | Yes | CsA            | 1.0           | -                | 25               | 32             | 396                          | 494                        |
| 14             | 53 / F    | AML       | 68            | Chronic  | Yes | Pred, MMF      | -             | -                | <25              | ND             | -                            | -                          |
| 15             | 58 / M    | AML       | 57            | Chronic  | No  | MMF, SYK inh.  | 1.1           | -                | 312              | 212            | 5594                         | 1007                       |
| 16             | 25 / M    | AA        | 23            | Nil      | No  | Tacro, MMF     | 2.6           | <25              | 526              | 533            | -                            | -                          |
| 17             | 60 / M    | FL        | 55            | Resolved | No  | Nil            | -             | -                | <25              | ND             | -                            | -                          |
| 18             | 74 / M    | AML       | 54            | Nil      | No  | Nil            | 1.1           | -                | <25              | ND             | 82                           | 176                        |
| 19             | 49 / M    | MF        | 22            | Resolved | No  | Nil            | -             | -                | -                | -              | -                            | -                          |
| 20             | 48 / M    | CML, CP   | 77            | Nil      | No  | Nil            | 1.6           | -                | -                | -              | 4707                         | 2404                       |
| 21             | 58 / M    | CML, BP   | 64            | Nil      | No  | Nil            | 0.9           | -                | <25              | ND             | 521                          | 469                        |
| 22             | 43 / M    | PRCA      | 172           | Nil      | No  | Nil            | 1.4           | -                | -                | -              | 25                           | 153                        |
| 23             | 43 / F    | AML       | 20            | Nil      | No  | Nil            | 1.1           | -                | -                | -              | 25                           | 107                        |

ECP: extracorporeal photopheresis; IST: immunosuppressive therapy; OD – optical density, MDS – myelodysplastic syndrome, B-ALL – B/T ALL – B/T cell acute lymphoblastic leukaemia, MPAL – mixed phenotype acute leukaemia, AML – acute myeloid leukaemia, AA – aplastic anaemia, FL – follicular lymphoma, MF – myelofibrosis, CML – chronic myeloid leukaemia, PRCA – pure red cell aplasia, CsA – ciclosporin A, Pred – prednisolone, MMF – mycophenolate mofetil, Rux – ruxolitinib, Tacro – tacrolimus, Imat – imatinib

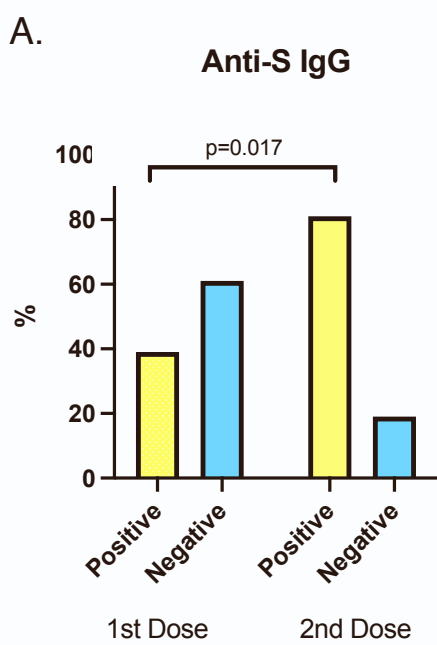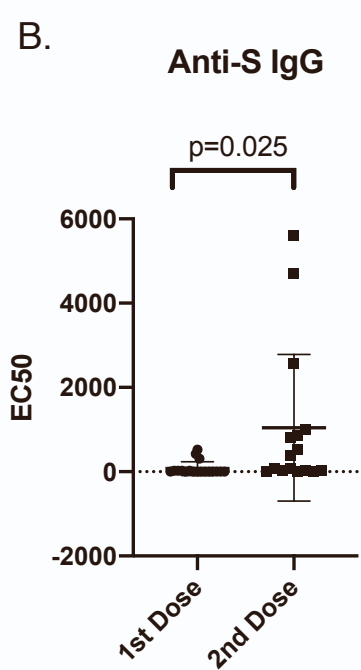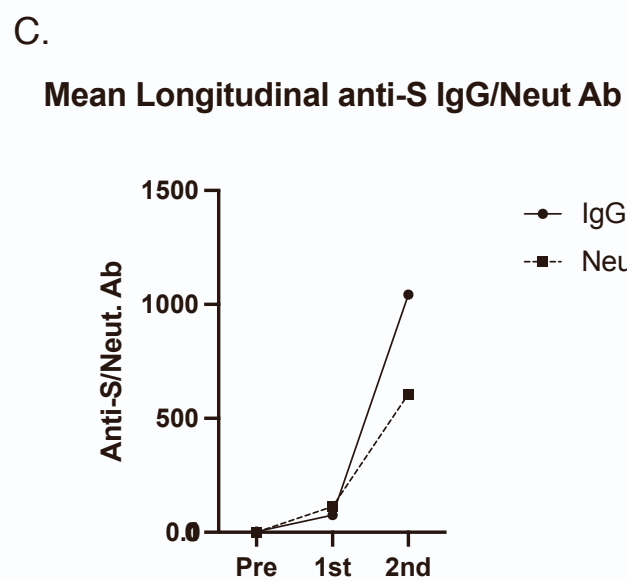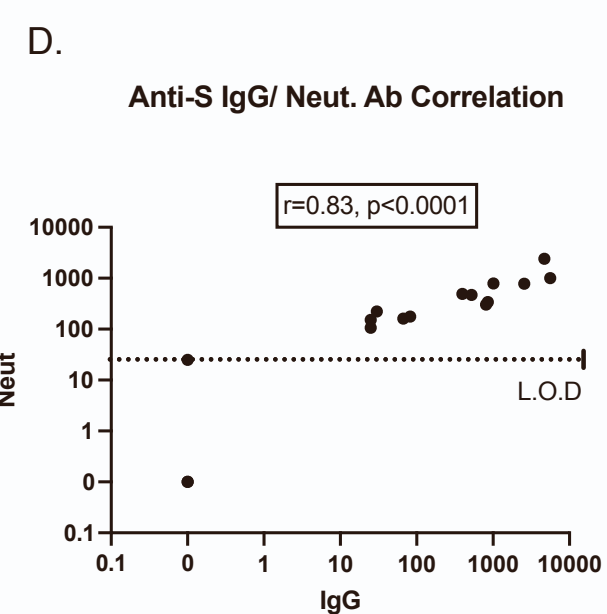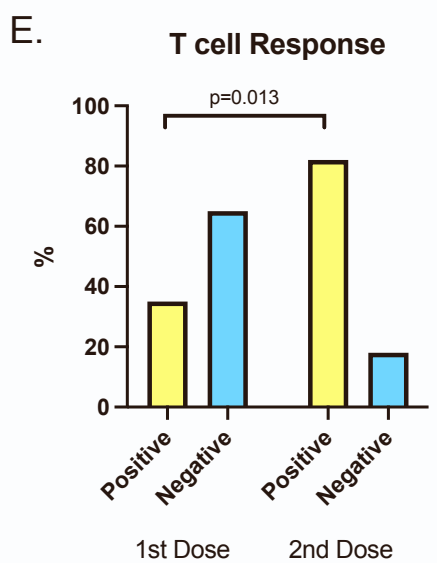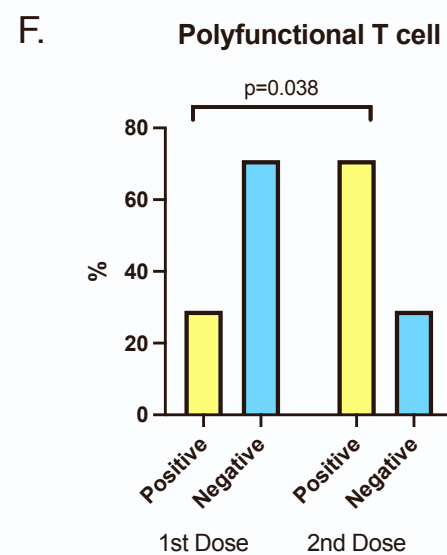

**G. Post 1<sup>st</sup> Dose**

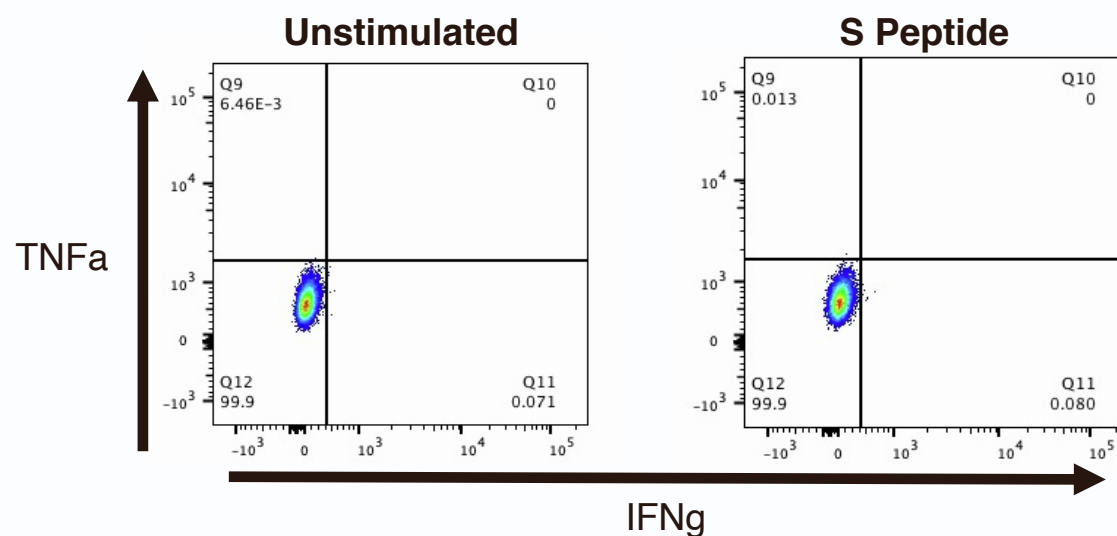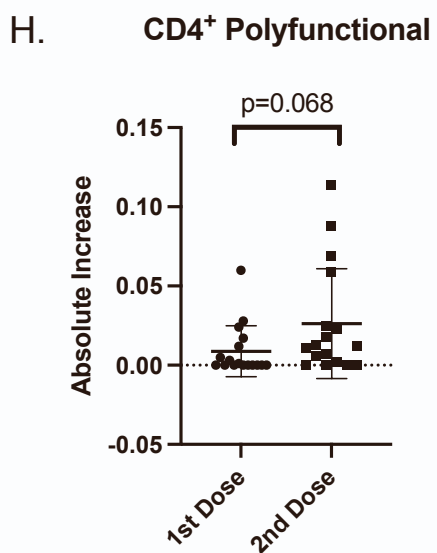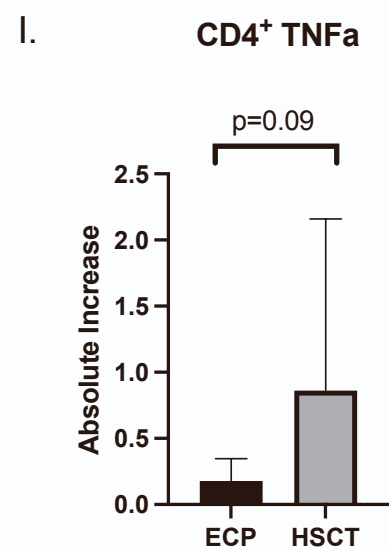

**Post 2<sup>nd</sup> Dose**

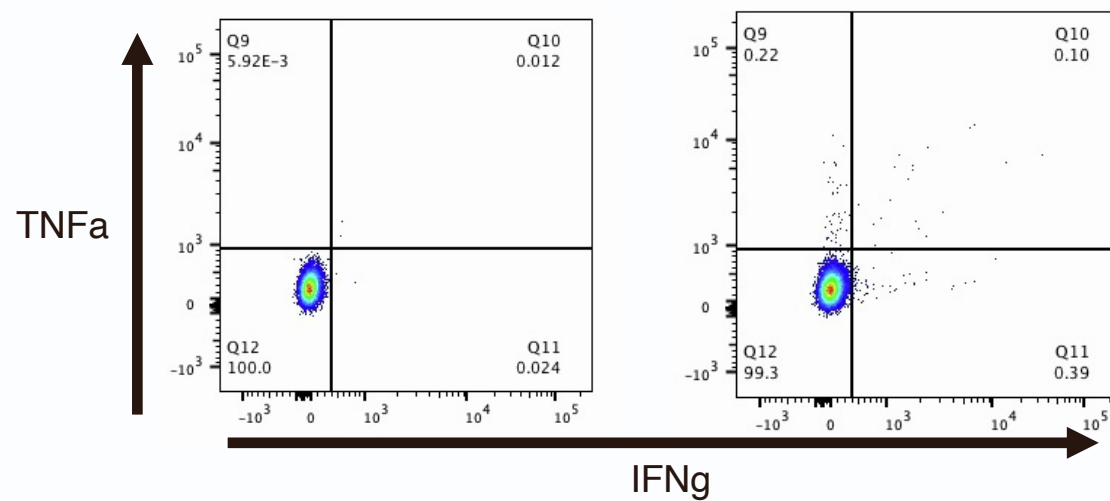

Figure S1. Humoral and T cell response to sequential doses of vaccine against SARS-CoV-2 in allo-SCT Recipients

- A) Anti-S IgG response after first and second vaccine dose showing increase in seroconversion rate following second dose of vaccine. Yellow bar represents positive response and blue represents negative response. (Fisher's Exact Test).
- B) Anti-S IgG Effective Concentration 50 (EC50) after first and second vaccine doses showing increase in EC50 with second dose of vaccine (Independent samples t-test).
- C) Mean anti-S IgG EC50 and Neutralizing Antibody Infectious Dose 50 (ID50) Level pre-vaccine and after 1st and 2nd vaccine doses of vaccine. Solid line represents mean anti-S IgG EC50 and dotted line represents mean neutralising antibody ID50.
- D) Correlation of Anti-S IgG and Neutralizing Antibody ID50 from paired samples (Spearman's rank correlation coefficient). Limit of detection (L.O.D) at a dilution of 1:25 represented by dotted line.
- E) Total (CD4<sup>+</sup>/CD8<sup>+</sup>) T cell response after first and second vaccine dose showing increase in memory T cell response following second dose of vaccine. Yellow bar represents positive response and blue represents negative response. (Fisher's Exact Test).
- F) Polyfunctional T cell response after first and second vaccine dose showing increase in memory T cell response following second dose of vaccine. Yellow bar represents positive response and blue represents negative response. (Fisher's Exact Test).
- G) CD4<sup>+</sup> T cell polyfunctional (IFN $\gamma$ /TNF $\alpha$ ) response after 1st vaccine dose (top) and 2nd vaccine dose (bottom). Left plots show unstimulated cell and right plots show cells incubated with S peptides, with polyfunctional response observed in sample stimulated with S peptides post second vaccine dose.
- H) Absolute increase in CD4<sup>+</sup> T cell polyfunctional cell (IFN $\gamma$ /TNF $\alpha$ ) showing increase following second dose of vaccine.
- I) CD4<sup>+</sup> T cell TNF $\alpha$  absolute increase in ECP (extracorporeal photopheresis) cohort vs non ECP SCT cohort showing increase in TNF $\alpha$  expression in SCT patients not undergoing ECP (Independent samples t-test).

## Supplementary Methods

### Intracellular cytokine flow cytometry assay

T cell functionality was assessed using intracellular cytokine staining after incubation with SARS-CoV-2 specific peptides covering the immunogenic domains of the Spike (S) protein (Miltenyi Biotech). Cells were thawed, then rested for 18 hours at 37°C, 5% CO<sub>2</sub>. Specific peptides (0.25 µg/ml) and anti-CD28 (BD bioscience) were added for 3 hours, followed by Brefeldin-A (BFA) for an additional 3 hours. Unstimulated cells were utilised as negative controls and PMA and Ionomycin (Miltenyi Biotech) was added separately as a positive control. Cells were stained with a viability dye, stained with antibodies directed against surface markers, and fixed and permeabilised (BD CytoFix/Cytoperm) prior to staining with antibodies directed against intracellular cytokines. Directly conjugated monoclonal antibodies with the following specificities were used; CD3 BUV395 (clone SK37), CD4 PE (clone M-T477), CD45RO BV711, TNF $\alpha$  (clone MAB11) and IFN $\gamma$  APC (clone B27). Live dead staining was performed using Zombie NIR amine reactive fluorescent dye (Biolegend). Gating on the lymphocyte population, single cells, live cells, CD3<sup>+</sup> cells, CD4<sup>+</sup> cells and CD4<sup>-</sup> (CD8<sup>+</sup>) was performed. T cell analysis was performed on a BD Fortessa cytometer and results processed using Flowjo version 10.5. Statistical analysis was performed using Prism, version 8.

### ELISA protocol

ELISAs were conducted as previously described<sup>1</sup>. All plasma samples were heat-inactivated at 56 °C for 30 min before use. High-binding ELISA plates (Corning, 3690) were coated with antigen (Nuclear (N) protein or the S glycoprotein at 3µg ml<sup>-1</sup> (25 µl per well) in PBS, either overnight at 4 °C or for 2 h at 37 °C. Wells were washed with PBS-T (PBS with 0.05% Tween-20) and then blocked with 100 µl of 5% milk in PBS-T for 1 h at room temperature. The wells were emptied and serial dilutions of plasma (starting at 1:25, 6-fold dilution) were added and incubated for 2 h at room temperature. Control reagents included CR3009 (2 µg ml<sup>-1</sup>)(N-specific monoclonal antibody), CR3022 (0.2 µg ml<sup>-1</sup>)(S-specific monoclonal antibody), negative control plasma (1:25 dilution), positive control plasma (1:50), and blank wells. Wells were washed with PBS-T. Secondary antibody was added and incubated for

1h at room temperature. IgG was detected using goat-anti-human-Fc-AP (alkaline phosphatase) (1:1,000) (Jackson, catalogue no. 109-055-098) and wells were washed with PBS-T and AP substrate (Sigma) was added and plates read at 405 nm. EC50 values were calculated in GraphPad Prism. Where an EC50 was not reached at 1:25, a plasma was considered seropositive if the OD at 405nm was 4-fold above background and a value of 25 was assigned.

#### Neutralization assay with SARS-CoV-2

HIV-1 (human immunodeficiency virus type-1) based virus particles, pseudotyped with SARS-CoV-2 Wuhan Spike were prepared in HEK-293T/17 cells and neutralization assays were conducted as previously described<sup>3</sup>. Serial dilutions of plasma samples (heat inactivated at 56 °C for 30 min) were prepared in DMEM complete media (10% foetal bovine serum -FBS, 1% Pen/Strep (100 IU/mL penicillin and 100 mg/mL streptomycin) and incubated with pseudotyped virus for 1 h at 37 °C in 96-well plates. Next, HeLa cells stably expressing the ACE2 receptor (provided by Dr James Voss, Scripps Research, La Jolla, CA) were added (12,500 cells/50µL per well) and the plates were left for 72 hours. Infection level was assessed in lysed cells with the Bright-Glo luciferase kit (Promega), using a Victor™ X3 multilabel reader (Perkin Elmer). Measurements were performed in duplicate and the duplicates used to calculate the serum dilution that inhibits 50% infection (ID50) using GraphPad Prism.
